# Supplementary material
Source: MDPI journal article supplement (https://www.mdpi.com/2071-1050/13/3/1329)
Supplement: s1 [file s1]

Supplementary Materials

# OVALI, Sustainability for Poultry®: A Method Co-designed by Stakeholders to Assess the Sustainability of Chicken Supply Chains in their Territories

## *Supplementary File S1: Detailed Description of the Indicators of the OVALI Method*

Bertrand Méda<sup>1,\*</sup>, Léonie Dusart<sup>2</sup>, Juliette Protino<sup>1,†</sup>, Philippe Lescoat<sup>3</sup>, Cécile Berri<sup>1</sup>, Pascale Magdelaine<sup>4</sup> and Isabelle Bouvarel<sup>2</sup>

<sup>1</sup> INRAE, Université de Tours, BOA, 37380 Nouzilly, France; cecile.berri@inrae.fr

<sup>2</sup> Institut Technique de l'Aviculture, 37380 Nouzilly, France; dusart@itavi.asso.fr (L.D.); bouvarel@itavi.asso.fr (I.B.)

<sup>3</sup> AgroParisTech, INRAE, Université Paris-Saclay, SADAPT, 75005 Paris, France; philippe.lescoat@agroparistech.fr

<sup>4</sup> Institut Technique de l'Aviculture, 75009 Paris, France; magdelaine@itavi.asso.fr

\* Correspondence: bertrand.meda@inrae.fr; Tel.: +33-(0)247-427-847

† Current address: Syndicat National des Labels Avicoles de France, 75009 Paris, France; j.protino@sinalaf.com

**Citation:** Bertrand Méda; Léonie Dusart; Protino, J.; Lescoat, P.; Cécile Berri; Magdelaine, P.; Bouvarel, I. OVALI, Sustainability for Poultry®: A Method Co-designed by Stakeholders to Assess the Sustainability of Chicken Supply Chains in their Territories. *Sustainability* **2021**, *13*, 1329. <https://doi.org/10.3390/su13031329>

† Current address: Syndicat National des Labels Avicoles de France, 75009 Paris, France j.protino@sinalaf.com

Received: 22 December 2020

Accepted: 22 January 2021

Published: 28 January 2021

**Publisher's Note:** MDPI stays neutral with regard to jurisdictional claims in published maps and institutional affiliations.

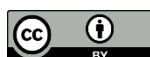

**Copyright:** © 2021 by the authors. Licensee MDPI, Basel, Switzerland. This article is an open access article distributed under the terms and conditions of the Creative Commons Attribution (CC BY) license (<http://creativecommons.org/licenses/by/4.0/>).

### List of the Indicators of the OVALI Method

|                                                                                                             |    |
|-------------------------------------------------------------------------------------------------------------|----|
| List of the Indicators of the OVALI Method .....                                                            | 2  |
| Economic Pillar.....                                                                                        | 4  |
| ECO.I1–Production Cost (At Slaughterhouse Exit Gate).....                                                   | 5  |
| ECO.I2–Non-Price Competitiveness of the Product .....                                                       | 5  |
| ECO.I3–Net Margin of Supply Chain Operators.....                                                            | 7  |
| ECO.I4–Added Value of Supply Chain Operators .....                                                          | 9  |
| ECO.I5–Number of Jobs in the Supply Chain within the Territory .....                                        | 10 |
| ECO.I6–Percentage of Added Value Created in France.....                                                     | 12 |
| ECO.I7–Price Competitiveness of the Product Compared to Competing Products .....                            | 13 |
| ECO.I8–Organoleptic Quality of the Product (Taste, Visual Appearance).....                                  | 14 |
| ECO.I9–Cooperation between Supply Chain Operators .....                                                     | 15 |
| ECO.I10–Diffusion of Technical Innovation in the Supply Chain.....                                          | 16 |
| ECO.I11–Budget Allocated for R&D and Development of Innovative Tools and Services in the Supply Chain ..... | 17 |
| ECO.I12–Level of overall investment (excluding R&D) .....                                                   | 18 |
| ECO.I13–Net Balance of Chicken Trade Volume between France and European Union .....                         | 19 |
| ECO.I14–Net Balance of Chicken Trade Volume Between France and Non-EU Countries.....                        | 20 |
| ECO.I15–European Share of Vegetal Proteins in Chicken Feed.....                                             | 21 |
| Social Pillar.....                                                                                          | 22 |
| SOC.I1–Level of Overall Investment (excluding R&D) .....                                                    | 23 |
| SOC.I2–Purchasing Capacity for Products.....                                                                | 24 |
| SOC.I3–Existence of a Logo Stating the French Origin.....                                                   | 25 |
| SOC.I4–Statement on Absence of GMO in Chicken Feed.....                                                     | 26 |
| SOC.I5–Statement on European Origin of Feedstuffs used in Chicken’s Feed .....                              | 27 |
| SOC.I6–Chicken Welfare .....                                                                                | 28 |
| SOC.I7–Workers' Welfare for Each Link in the Supply Chain.....                                              | 31 |
| SOC.I8–Renewal of Poultry Farms .....                                                                       | 33 |
| SOC.I9–Communication with Public about Poultry Sector .....                                                 | 34 |
| SOC.I10–Existence of a Crisis Management and Media Monitoring Cell.....                                     | 35 |
| SOC.I11–Professional Responsibility of Poultry Sector Stakeholders.....                                     | 36 |
| SOC.I12–Local and Regional Supply for Mass Catering.....                                                    | 37 |

|                                                                                                       |    |
|-------------------------------------------------------------------------------------------------------|----|
| SOC.I13–Extra-Professional Responsibility of Poultry Industry Stakeholders within the Territory ..... | 38 |
| SOC.I14–Approval of Installation and Expansion Requests in the Territory .....                        | 39 |
| Environmental Pillar .....                                                                            | 40 |
| ENV.I1–Consumption of Non-renewable Energy .....                                                      | 41 |
| ENV.I2–Consumption of Phosphates by Crops and Animals .....                                           | 42 |
| ENV.I3–TotalA of Water Taken from Public Network.....                                                 | 43 |
| ENV.I4–Approval of Installation and Expansion Requests in the Territory .....                         | 44 |
| ENV.I5–Number of Vegetal Species used in Chickens Feed.....                                           | 45 |
| ENV.I6–Total Emission of Greenhouse Gas .....                                                         | 46 |
| ENV.I7–Total Particle Emission .....                                                                  | 47 |
| ENV.I8–Eutrophication .....                                                                           | 48 |
| ENV.I9–Acidification .....                                                                            | 49 |
| ENV.I10–Total Particle Emission .....                                                                 | 50 |
| ENV.I11–Use of Allopathic Treatments.....                                                             | 51 |
| ENV.I12–Proportion of Used By-products.....                                                           | 52 |
| ENV.I13–Integration of Production Equipment into Landscape.....                                       | 53 |
| ENV.I14–Integration of Production Equipment into Landscape.....                                       | 55 |
| ENV.I15–Agroecological Landscaping in Farms.....                                                      | 56 |
| ENV.I16–Integration of Production Equipment into Landscape.....                                       | 56 |

## **Economic Pillar**

## ECO.I1–Production Cost (At Slaughterhouse Exit Gate)

(17 points; 2 sub-indicators)

**Table ECO.I1** Description of the sub-indicators<sup>1</sup> considered for the calculation of ECO.I1 indicator.

| Sub-indicator                                        | Unit                  | Scale or SC Links Concerned | Method(s)                   | Origin of Data             |
|------------------------------------------------------|-----------------------|-----------------------------|-----------------------------|----------------------------|
| Live weight production cost at farm gate (10 points) | € / tonne live weight | chicken farms               | ITAVI production cost model | operators, ITAVI expertise |
| Production cost in slaughterhouse (7 points)         | € /tonne carcass      | slaughtering                | ITAVI production cost model | operators, ITAVI expertise |

<sup>1</sup> The scores of the sub-indicators are added to provide a single score for ECO.I1 indicator.

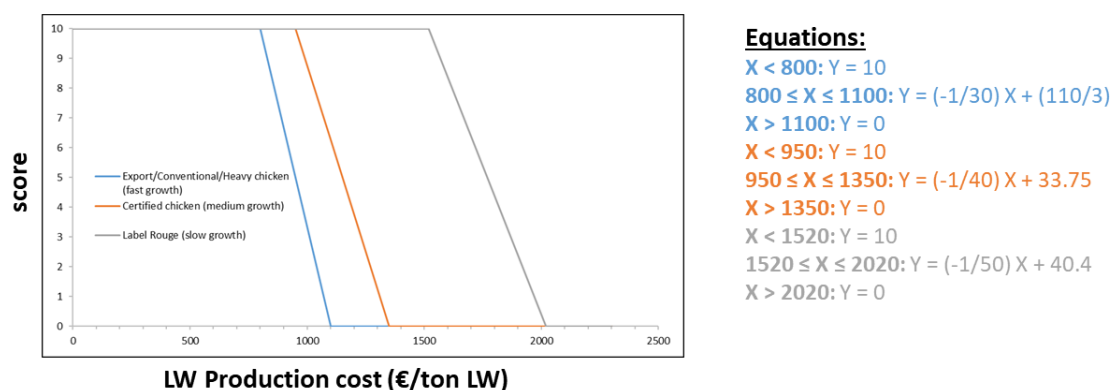

**Figure ECO.I1a** Conversion scale for sub-indicator “Live weight production cost at farm gate”.

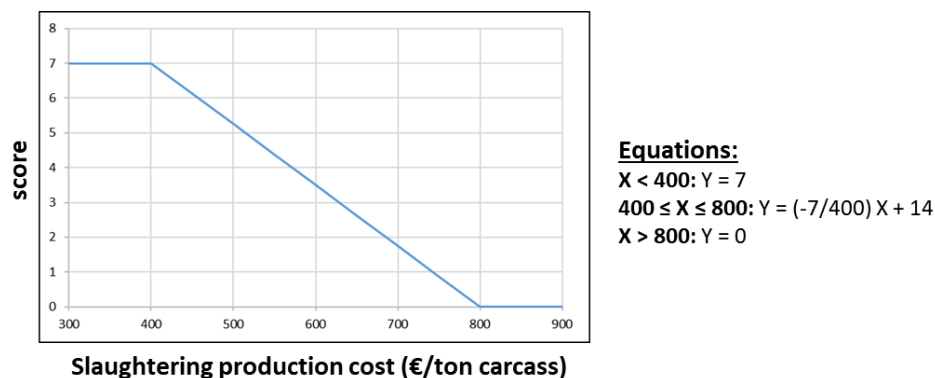

**Figure 1. b** Conversion scale for sub-indicator “Production cost in slaughterhouse”.

Conversion scales were fit using reference production costs measured in France and in other countries (Brazil) by ITAVI and High Council for Food, Agriculture and Rural Areas (French Ministry of Agriculture). The same function is used for slaughtering of all chicken productions, but different functions are used for different chicken production.

## ECO.I2–Non-Price Competitiveness of the Product

(10 points; 5 sub-indicators)

**Table ECO.I2a** Description of the sub-indicators<sup>1</sup> considered for the calculation of ECO.I2 indicator.

| Sub-indicator                                                                    | Unit          | Scale or SC Links Concerned                                          | Method (s)                       | Origin of Data |
|----------------------------------------------------------------------------------|---------------|----------------------------------------------------------------------|----------------------------------|----------------|
| Value of constraints and over costs due to the product specifications (2 points) | ordinal scale | whole SC (except chicken farms, production organizations, retailing) | survey <sup>2</sup>              | operators      |
| Services and logistics (2 points)                                                | ordinal scale | retailing                                                            | survey <sup>2</sup> <sub>3</sub> | operators      |
| Operators' reactivity (2 points)                                                 | ordinal scale | retailing                                                            | survey <sup>2</sup> <sub>3</sub> | operators      |
| Product quality (2 points)                                                       | ordinal scale | retailing                                                            | survey <sup>2</sup> <sub>3</sub> | operators      |
| Product diversification (2 points)                                               | ordinal scale | retailing                                                            | survey <sup>2</sup> <sub>3</sub> | operators      |

<sup>1</sup> The scores of the sub-indicators are added to provide a single score for ECO.I2 indicator.

<sup>2</sup> When several operators are surveyed, an average score for each SC link is calculated, and used to calculate a global average score.

<sup>3</sup> For each survey, scores of the four sub-indicators are added before the calculation of average scores for each SC link. From these average scores, a global average score is calculated and added to the score of the first sub-indicator to provide the final score of ECO.I2 indicator.

**Table ECO.I2b** Description of the conversion scales for the sub-indicators considered for the calculation of ECO.I2 indicator.

| Value of Constraints and Over Costs due to the Product Specifications |        | Services and Logistics |        | Operators' Reactivity |        | Product Quality |        | Product Diversification      |        |
|-----------------------------------------------------------------------|--------|------------------------|--------|-----------------------|--------|-----------------|--------|------------------------------|--------|
| Answer                                                                | Points | Answer                 | Points | Answer                | Points | Answer          | Points | Answer                       | Points |
| High                                                                  | 2      | Good                   | 2      | Fast                  | 2      | Good            | 2      | Correct                      | 2      |
| Quite good                                                            | 1.5    | Quite good             | 1.5    | Quite fast            | 1.5    | Quite good      | 1.5    | Too / not enough diversified | 0      |
| Quite low                                                             | 1      | Quite bad              | 0      | Quite slow            | 1      | Quite bad       | 1      |                              |        |
| None                                                                  | 0      | Bad                    |        | Slow                  | 0      | Bad             | 0      |                              |        |

### ECO.I3–Net Margin of Supply Chain Operators

(13 points; 3 sub-indicators)

**Table ECO.I3a** Description of the sub-indicators<sup>1</sup> considered for the calculation of ECO.I3 indicator.

| Sub-indicator                                       | Unit                     | Scale or SC Links Concerned                                             | Method (s) | Origin of Data |
|-----------------------------------------------------|--------------------------|-------------------------------------------------------------------------|------------|----------------|
| Net margin of operators (5 points)                  | % of revenues            | hatchery, feed production, slaughtering, food processing <sup>2,3</sup> | survey     | operators      |
| Good repartition of net margin in the SC (2 points) | yes / no                 | hatchery, feed production, slaughtering, food processing <sup>2,3</sup> | survey     | operators      |
| Available income for farmers (6 points)             | € / man work unit / year | chicken farms, production organizations <sup>4</sup>                    | survey     | farmers        |

<sup>1</sup> The scores of the sub-indicators are added to provide a single score for ECO.I3 indicator.

<sup>2</sup> A global score for this indicator is calculated as the sum of the average score of each SC link multiplied by their respective weighting coefficient. Weighting coefficients were chosen in function of the difficulty to reach the objectives of net margin: 20 % for hatchery; 30 % for feed production; 50 % for slaughtering and food processing.

<sup>3</sup> Production organizations were not surveyed as they don't have an objective of net margin, and are generally associated to a feed producer or a slaughterhouse. Genetic selection and retailers were not surveyed as we considered that their activity would be the same independently from the sustainability of the chicken SC.

<sup>4</sup> An average score is calculated from the answers of the different surveyed operators.

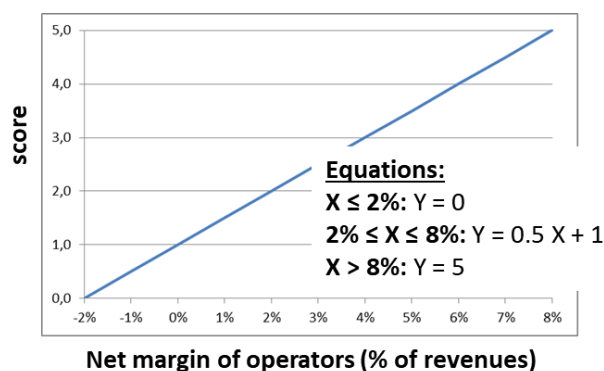

**Figure ECO.I3a** Conversion scale for sub-indicator “Net margin of operators”.

**Table ECO.I3b** Conversion scale for sub-indicator “Good repartition of net margin in the SC”.

| Answer | Points |
|--------|--------|
| Yes    | 2      |
| No     | 0      |

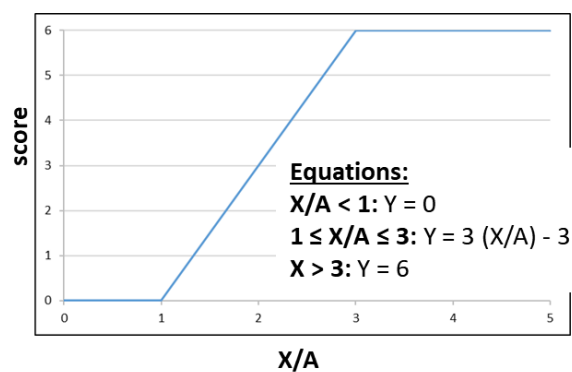

**Figure ECO.I3b** Conversion scale for sub-indicator “Net margin of operators”. X: net margin of farmers (€/year); A: annual minimum wage (€/year).



## ECO.I4–Added Value of Supply Chain Operators

(13 points; 2 sub-indicators)

**Table ECO.I4a** Description of the two sub-indicators<sup>1</sup> considered for the calculation of ECO.I4 indicator.

| Sub-indicator                                         | Unit                     | Scale or SC Links Concerned                                  | Method (s) | Origin of Data |
|-------------------------------------------------------|--------------------------|--------------------------------------------------------------|------------|----------------|
| Added value produced for each SC operator (11 points) | % of revenues            | hatchery, feed production, slaughtering, food processing 2,3 | survey     | operators      |
| Good repartition of added value in the SC (2 points)  | € / man work unit / year | hatchery, feed production, slaughtering, food processing 2,3 | survey     | operators      |

<sup>1</sup> The scores of the sub-indicators are added to provide a single score for ECO.I4 indicator.

<sup>2</sup> Production organizations were not surveyed as they don't have an objective of net margin, and are generally associated to a feed producer or a slaughterhouse. Genetic selection and retailers were not surveyed as we considered that their activity would be the same independently from the sustainability of the chicken SC.

<sup>3</sup> A global score for this indicator is calculated as the sum of the average score of each SC link multiplied by their respective weighting coefficient. Weighting coefficients were chosen in function of the difficulty to reach the objectives of net margin:

20 % for hatchery; 30 % for feed production; 50 % for slaughtering and food processing.

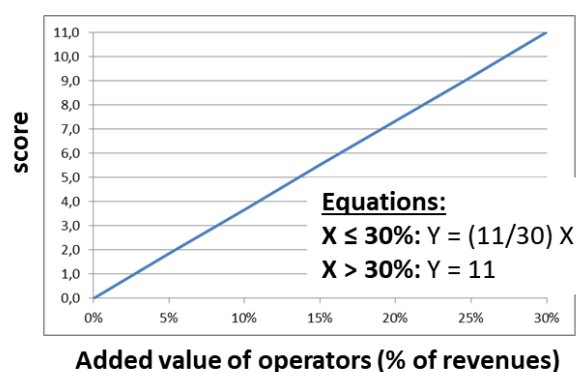

**Figure ECO.I4** Conversion scale for sub-indicator “Added value produced for each SC operator Net margin of operators”.

**Table ECO.I4b** Conversion scale for sub-indicator “Good repartition of added value in the SC”.

| Answer | Points |
|--------|--------|
| Yes    | 2      |
| No     | 0      |

**ECO.I5–Number of Jobs in the Supply Chain within the Territory**

(10 points; 4 sub-indicators)

**Table ECO.I5.** Description of the sub-indicators<sup>1</sup> considered for the calculation of ECO.I5 indicator.

| Sub-indicator                                                | Unit   | Scale or SC Links Concerned     | Method (s) | Origin of Data       |
|--------------------------------------------------------------|--------|---------------------------------|------------|----------------------|
| Number of jobs (except in farms) (3 points)                  | number | whole SC (except chicken farms) | data-base  | agriculture chambers |
| Evolution of the number of jobs (except in farms) (2 points) | %      | whole SC (except chicken farms) | data-base  | agriculture chambers |
| Number of jobs in farms (3 points)                           | number | chicken farms                   | data-base  | agriculture chambers |
| Evolution of the number of jobs in farms (2 points)          | %      | chicken farms                   | data-base  | agriculture chambers |

<sup>1</sup> The scores of the sub-indicators are added to provide a single score for tECO.I5 indicator.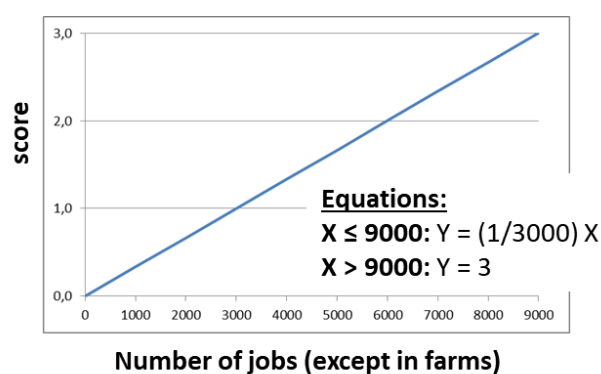**Figure ECO.I5a** Conversion scale for sub-indicator “Number of jobs (except in farms) ”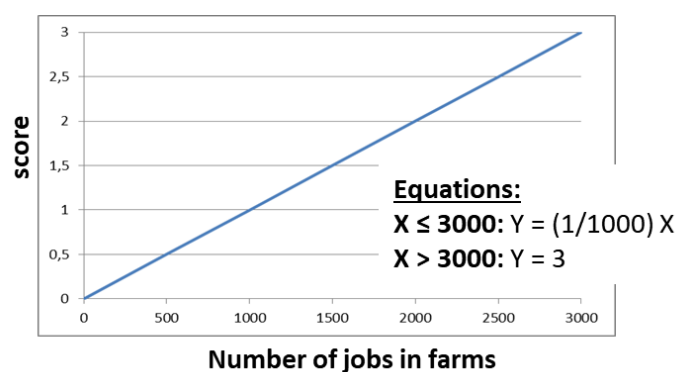**Figure ECO.I5b** Conversion scale for sub-indicator “Number of jobs in farms”

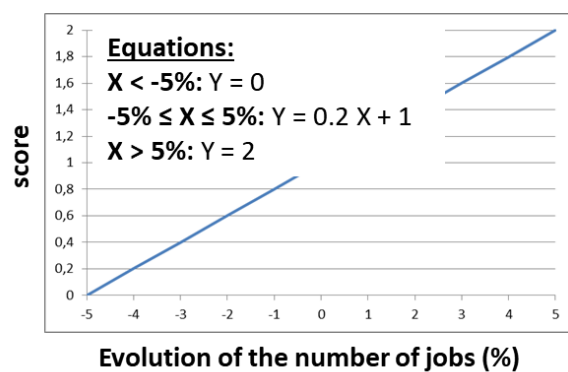

**Figure ECO.I5c** Conversion scale for sub-indicators “Evolution of the number of jobs (except in farms)” and “Evolution of the number of jobs in farms”.

**ECO.I6–Percentage of Added Value Created in France.**

(10 points; 1 indicator)

**Table ECO.I6** Description of ECO.I6 indicator.

| Indicator                                                     | Unit | Scale or SC Links Concerned                              | Method(s)        | Origin of Data   |
|---------------------------------------------------------------|------|----------------------------------------------------------|------------------|------------------|
| Share of the total added value produced in France (10 points) | %    | hatchery, feed production, slaughtering, food processing | survey, database | operators, ITAVI |

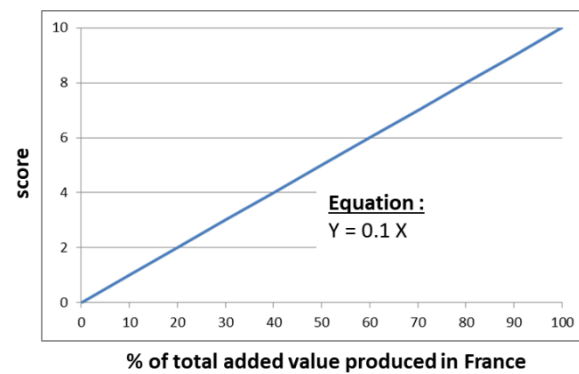**Figure ECO.I6** Conversion scale for ECO.I6 indicator.

## ECO.I7–Price Competitiveness of the Product Compared to Competing Products

(16 points; 1 indicator)

Table ECO.I7 Description of the ECO.I7 indicator.

| Indicator                                                                                                          | Unit     | Scale or SC Links | Method(s)                       | Origin of Data                                                   |
|--------------------------------------------------------------------------------------------------------------------|----------|-------------------|---------------------------------|------------------------------------------------------------------|
| Difference of price between the product and other meat products in competition (in consumer's mind)<br>(16 points) | base 100 | retailing         | Database, survey <sup>1,2</sup> | KANTAR, Worldpanel, 2012<br>www.macdonalds.fr<br>www.re-dyme.com |

<sup>1</sup> An average score is calculated from the answers of the different surveyed operators.

<sup>2</sup> When several products are produced in the SC, a weighted score is calculated using the % of each product in national production.

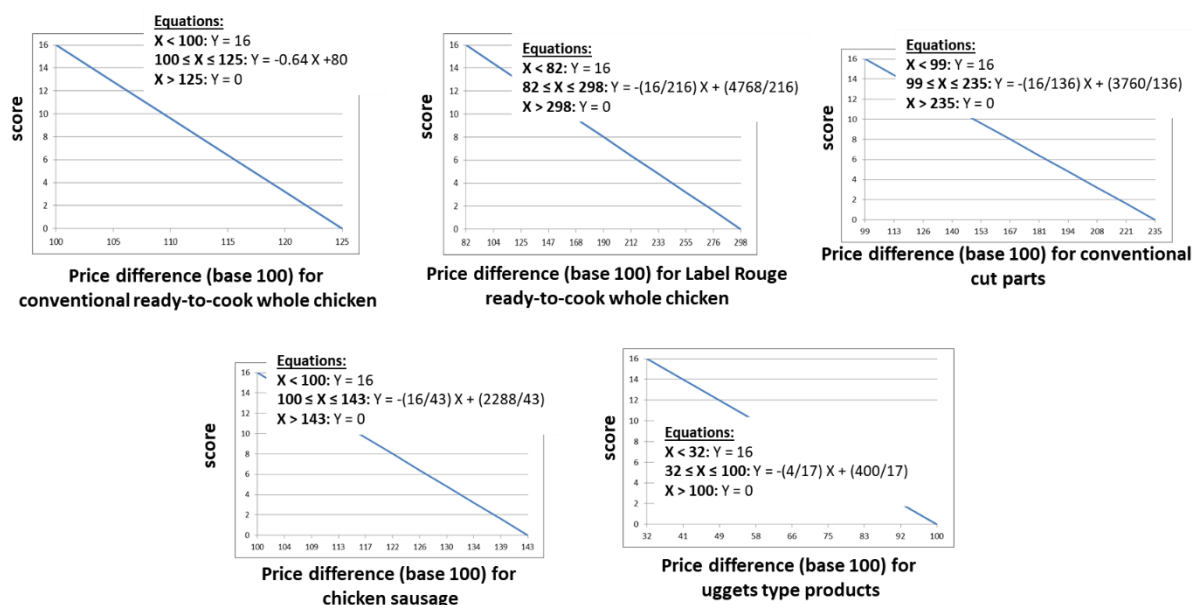

Figure ECO.I7 Conversion scales for ECO.I7 indicator.

**ECO.I8–Organoleptic Quality of the Product (Taste, Visual Appearance)**

(10 points; 4 sub-indicators)

**Table ECO.I8a** Description of the sub-indicators<sup>1</sup> considered for the calculation of ECO.I8 indicator.

| Sub-indicator                                            | Unit          | Scale or SC Links Concerned              | Method(s)  | Origin of Data                                                                                                     |
|----------------------------------------------------------|---------------|------------------------------------------|------------|--------------------------------------------------------------------------------------------------------------------|
| Whole chicken visual aspect (3 points)                   | ordinal scale | slaughtering, food processing, retailing | survey     | operators                                                                                                          |
| Cut parts or processed products visual aspect (3 points) | ordinal scale | slaughtering, food processing, retailing | survey     | operators                                                                                                          |
| Modified atmosphere packaging (2 points)                 | ordinal scale | slaughtering, food processing, retailing | survey     | operators                                                                                                          |
| Taste (2 points)                                         | ordinal scale | slaughtering, food processing, retailing | literature | Humber F, Delannoy J, 2011. Que choisir, n°497.<br>Guibert F, Victoria R, 2004. 60 million de consommateurs, n°380 |

<sup>1</sup> For each survey, scores of the four sub-indicators are added before the calculation of an average score per each SC link, from which a global average score is calculated for ECO.I8 indicator.

**Table ECO.I8b** Conversion scales for sub-indicators considered for the calculation of ECO.I8 indicator.

| Whole Chicken Visual Aspect |        | Cut Parts or Processed Products Visual Aspect |        | Modified-Atmosphere Packaging | Taste  |            |        |
|-----------------------------|--------|-----------------------------------------------|--------|-------------------------------|--------|------------|--------|
| Answer                      | Points | Answer                                        | Points | Answer                        | Points | Answers    | Points |
| Very good                   | 3      | Very good                                     | 3      | Yes (≥60% of products)        | 2      | Very good  | 2      |
| Good                        | 2      | Good                                          | 2      | Yes (<60% of products)        | 1      | Good       | 1.5    |
| Medium good                 | 1      | Medium good                                   | 1      | No                            | 0      | Quite good | 1      |
| Bad                         | 0      | Bad                                           | 0      |                               |        | Acceptable | 0      |

**ECO.I9–Cooperation between Supply Chain Operators**

(15 points; 2 sub-indicators)

**Table ECO.I9a** Description of the sub-indicators<sup>1</sup> considered for the calculation of ECO.I9 indicator.

| Scheme                                                          | Unit          | Scale or SC Links Concerned     | Method(s) | Origin of Data |
|-----------------------------------------------------------------|---------------|---------------------------------|-----------|----------------|
| Working groups on chicken production issues (5 points)          | ordinal scale | whole SC                        | survey    | operators      |
| Quality of interactions with the other SC operators (10 points) | ordinal scale | whole SC (except chicken farms) | survey    | operators      |

<sup>1</sup> Average scores for each sub-indicator are calculated and added to provide the final score of the ECO.I9 indicator.

**Table ECO.I9b** Conversion scale for sub-indicator “Working groups on chicken production issues”.

| Meetings with other SC operators  |        |
|-----------------------------------|--------|
| Answer                            | Points |
| Yes ( $\geq 2$ SC links involved) | 5      |
| Yes ( $< 2$ SC links involved)    | 3      |
| No                                | 0      |

**Table ECO.I9c** Conversion scale for sub-indicator “Quality of interactions with the other SC operators”. 10 is considered to be the best grade.

| Meetings with other SC operators |        |
|----------------------------------|--------|
| Answer                           | Points |
| 10                               | 10     |
| 8–9                              | 8      |
| 6–7                              | 6      |
| 4–5                              | 4      |
| 2–3                              | 2      |
| 0–1                              | 0      |

**ECO.I10–Diffusion of Technical Innovation in the Supply Chain**

(10 points; 8 sub-indicators)

**Table ECO.I10a** Description of the sub-indicators<sup>1</sup> considered for the calculation of ECO.I10 indicator.

| Sub-indicator                                  | Unit                     | Scale or SC Links Concerned                               | Method(s)              | Origin of Data     |
|------------------------------------------------|--------------------------|-----------------------------------------------------------|------------------------|--------------------|
| R&D division in companies (1 point)            | yes / no<br><sup>1</sup> | whole SC (except chicken farms, production organizations) | survey<br><sup>2</sup> | operators          |
| Work with other companies/structures (1 point) | yes / no<br><sup>1</sup> | whole SC (except chicken farms, production organizations) | survey<br><sup>2</sup> | operators          |
| Accessibility to information (3 points)        | ordinal scale            | whole SC (except chicken farms, production organizations) | survey<br><sup>2</sup> | operators          |
| Information source: magazines (0.5 points)     | yes / no<br><sup>1</sup> | chicken farms, production organizations                   | survey<br><sup>2</sup> | operators, farmers |
| Information source: open farm events (1 point) | yes / no<br><sup>1</sup> | chicken farms, production organizations                   | survey<br><sup>2</sup> | operators, farmers |
| Information source: training day (1.5 points)  | yes / no<br><sup>1</sup> | chicken farms, production organizations                   | survey<br><sup>2</sup> | operators, farmers |
| Easy access to information (1 point)           | yes / no<br><sup>1</sup> | chicken farms, production organizations                   | survey<br><sup>2</sup> | operators, farmers |
| Work with other companies/structures (1 point) | yes / no<br><sup>1</sup> | chicken farms, production organizations                   | survey<br><sup>2</sup> | operators, farmers |

<sup>1</sup> 0 point when the answer is no.<sup>2</sup> For each survey, scores of the three or five sub-indicators are added before the calculation of an average score per SC link. The two global average scores are added to provide the final score of the ECO.I10 indicator.**Table ECO.I10b** Conversion scale for sub-indicator “Accessibility to information”. 10 is considered to be the best grade.

| Accessibility to information |        |
|------------------------------|--------|
| Answer                       | Points |
| 8–10                         | 3      |
| 5–7                          | 2      |
| 2–4                          | 1      |
| 0–1                          | 0      |



### ECO.I11–Budget Allocated for R&D and Development of Innovative Tools and Services in the Supply Chain

(8 points; 1 indicator)

**Table ECO.I11a** Description of ECO.I11 indicator.

| Indicator                                                                                                | Unit | Scale or SC Links Concerned             | Method(s)           | Origin of Data |
|----------------------------------------------------------------------------------------------------------|------|-----------------------------------------|---------------------|----------------|
| Budget allocated for R&D and development of innovative tools and services in the supply chain (8 points) | %    | hatchery, slaughtering, food processing | survey <sup>1</sup> | operators      |

<sup>1</sup>For each survey, an average score per SC link is calculated, from which a global average score is calculated and used as the final score for the ECO.I11 indicator.

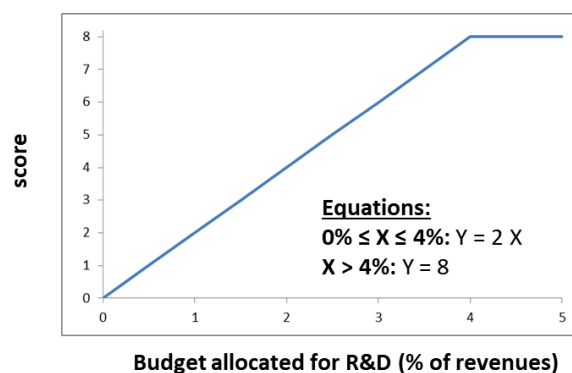

**Figure 7.** Conversion scale for ECO.I11 indicator.

**ECO.I12–Level of overall investment (excluding R&D)**

(8 points; 3 sub-indicators)

**Table ECO.I12a** Description of the sub-indicators<sup>1</sup> considered for the calculation of ECO.I12 indicator.

| Sub-indicator                                                                     | Unit | Scale or SC Links Concerned                              | Method(s)           | Origin of Data |
|-----------------------------------------------------------------------------------|------|----------------------------------------------------------|---------------------|----------------|
| Overall investment (excluding R&D) (4 points)                                     | %    | hatchery, feed production, slaughtering, food processing | survey <sup>2</sup> | operators      |
| Construction rate of new chicken houses in the production organization (3 points) | %    | production organizations                                 | survey <sup>3</sup> | operators      |
| Renovation rate of chicken houses in the production organization (1 point)        | %    | production organizations                                 | survey <sup>3</sup> | operators      |

<sup>1</sup> Final score of ECO.I12 indicator is calculated as the sum of the score of the three sub-indicators.<sup>2</sup> For each survey, an average score per SC link is calculated, from which a global score for the sub-indicator is calculated with the following weighting: 50% slaughtering + food processing; 30% feed production; 20% hatchery.<sup>3</sup> For each sub-indicator, an average score with answers of all surveyed operators is calculated.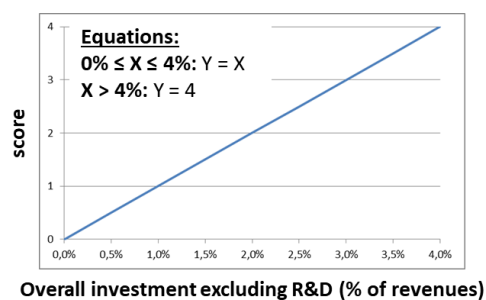**Overall investment excluding R&D (% of revenues)****Figure ECO.I12a** Conversion scale for sub-indicator “Overall investment (excluding R&D)”.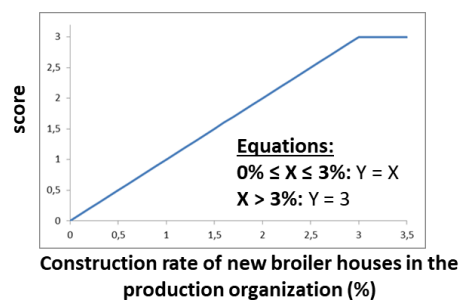**Construction rate of new broiler houses in the production organization (%)****Figure ECO.I12b** Conversion scale for sub-indicator “Construction rate of new chicken houses in the production organization”.**Table 12. b.** Conversion scale for sub-indicator “Renovation rate of chicken houses in the production organization”.

| Answer | Points |
|--------|--------|
| ≥5%    | 1      |
| <5%    | 0      |

### ECO.I13–Net Balance of Chicken Trade Volume between France and European Union (14 points; 1 indicator)

**Table ECO.I13** Description of ECO.I13 indicator.

| Indicator                                                                                         | Unit                                     | Scale or SC links concerned | Method(s) | Origin of data                                                          |
|---------------------------------------------------------------------------------------------------|------------------------------------------|-----------------------------|-----------|-------------------------------------------------------------------------|
| Net balance of chicken trade volume between France and European Union <sup>1</sup><br>(14 points) | 1000 tonnes of carcass weight equivalent | national production         | data-base | <a href="http://www.franceagrimer.fr/">http://www.franceagrimer.fr/</a> |

<sup>1</sup> Net balance = Exported volumes–Imported volumes.

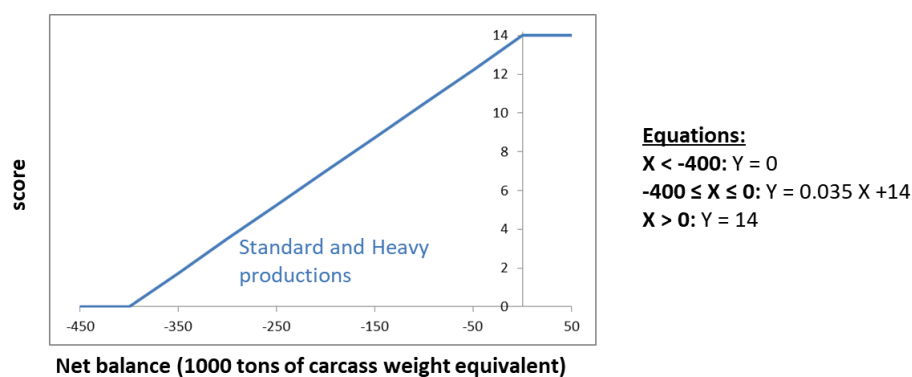

For « export » supply chain where chickens are exported to non-European countries. In that case, the score for the ECO.I13 indicator is 0. When the net balance is positive, maximum score is given.

For Label Rouge and Certified (medium growth) chickens: IF net balance  $\leq 0$  THEN score = 0 ELSE score = 14.

When there is no trade between France and European Union, the score is 0.

**Figure ECO.I13** Conversion scale for ECO.I13 indicator.

## ECO.I14–Net Balance of Chicken Trade Volume Between France and Non-EU Countries

(5 points; 1 indicator)

**Table ECO.I14** Description of ECO.I14 indicator.

| Indicator                                                                                        | Unit                                     | Scale or SC links concerned | Method(s) | Origin of data                                                          |
|--------------------------------------------------------------------------------------------------|------------------------------------------|-----------------------------|-----------|-------------------------------------------------------------------------|
| Net balance of chicken trade volume between France and European Union <sup>1</sup><br>(5 points) | 1000 tonnes of carcass weight equivalent | national production         | data-base | <a href="http://www.franceagrimer.fr/">http://www.franceagrimer.fr/</a> |

<sup>1</sup> Net balance = Exported volumes–Imported volumes (total chicken products).

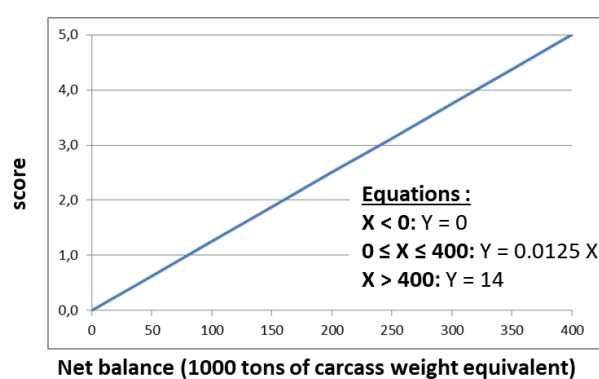

**Figure ECO.I14** Conversion scale for ECO.I14 indicator.

**ECO.I15–European Share of Vegetal Proteins in Chicken Fee**

(21 points; 1 indicator)

**Table ECO.I15** Description of ECO.I15 indicator.

| Indicator                                                      | Unit | Scale or SC Links concerned | Method (s)          | Origin of Data |
|----------------------------------------------------------------|------|-----------------------------|---------------------|----------------|
| European share of vegetal proteins in chicken feed (21 points) | %    | feed production             | survey <sup>1</sup> | operators      |

<sup>1</sup> Average feed produced by feed producers in the SC.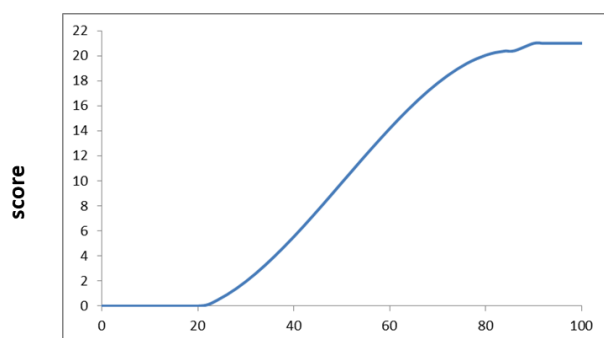**Equations :**

$$0\% \leq X \leq 20\%: Y = 0$$

$$20\% < X \leq 90\%: Y = -0.000119 X^3 + 0.01793 X^2 - 0.4564 X + 2.738$$

$$X > 90\%: Y = 21$$

**Figure ECO.I15** Conversion scale for ECO.I15 indicator.

## Social Pillar

**SOC.I1–Level of Overall Investment (excluding R&D)**

(24 points; 3 sub-indicators)

**Table SOC.I1a** Description of the sub-indicators considered for the calculation of SOC.I1 indicator.

| Sub-indicator                                   | Unit     | Scale or SC Links Concerned   | Method(s)                                                       | Origin of Data                                                                                           |
|-------------------------------------------------|----------|-------------------------------|-----------------------------------------------------------------|----------------------------------------------------------------------------------------------------------|
| Respect of sanitary legislation (REGL)          | yes / no | slaughtering, food processing | survey <sup>1</sup>                                             | operators                                                                                                |
| Presence of control plan (PLAN)                 | yes / no | slaughtering, food processing | survey <sup>1</sup>                                             | operators                                                                                                |
| Nutritional quality of the products (24 points) | %        | slaughtering, food processing | SAIN LIM method<br>Darmon et al. Am J Clin Nutr 2009;89:1227–36 | table CIQUAL ANSES ( <a href="https://pro.anses.fr/tableciqual/">https://pro.anses.fr/tableciqual/</a> ) |

<sup>1</sup> When several operators are surveyed, an average score for each SC link is calculated, and used to calculate a global average score.

**Table SOC.I1b** Nutritional quality of different poultry products using the SAIN LIM method. Breast meat is considered as the “best” product.

| Product                                             | Whole chicken         | Breast meat           | Leg                   | Nuggets              | Ham                   | Schnitzel or Cordon bleu or Sausage |
|-----------------------------------------------------|-----------------------|-----------------------|-----------------------|----------------------|-----------------------|-------------------------------------|
| % of production <sup>3</sup> (prod <sub>i</sub> )   | prod <sub>1</sub>     | prod <sub>2</sub>     | prod <sub>3</sub>     | prod <sub>4</sub>    | prod <sub>4</sub>     | prod <sub>5</sub>                   |
| Nutritional quality per product (nut <sub>i</sub> ) | nut <sub>1</sub> = 18 | nut <sub>2</sub> = 24 | nut <sub>3</sub> = 18 | nut <sub>4</sub> = 6 | nut <sub>5</sub> = 12 | nut <sub>6</sub> = 6                |

<sup>3</sup> Obtained by surveying operators.

Calculation of final score for SOC.I1 indicator:

$$Final\ score = \alpha \times \sum_{i=1}^6 \prod_{i=1}^6 prod_i \times nut_i$$

With:

$\alpha = 0$  if REGL = no

$\alpha = 1$  if REGL = yes and PLAN = yes

$\alpha = 0.6$  if REGL = yes and PLAN = no

**SOC.I2–Purchasing Capacity for Products**

(21 points; 2 sub-indicators)

**Table SOC.I2a** Description of the sub-indicators<sup>1</sup> considered for the calculation of SOC.I2 indicator.

| Sub-indicator                                                                                        | Unit                      | Scale or SC Links Concerned | Method(s)                     | Origin of Data                           |
|------------------------------------------------------------------------------------------------------|---------------------------|-----------------------------|-------------------------------|------------------------------------------|
| Number of hours of minimum wage required to buy the product (15 points)                              | h / kg product            | retailing                   | survey, database <sup>2</sup> | Operators; ITAVI 2013; KANTAR panel 2012 |
| Presence of the product on all market segments (whole chicken, cut parts, processed food) (6 points) | number of market segments | retailing                   | survey                        | operators                                |

<sup>1</sup> For each surveyed operator, the sum of the two sub-indicators is calculated. An average of these sums is used as the final score of SOC.I2 indicator.

<sup>2</sup> The number of hours is linked to the type of products considered (5 categories) and the values are taken from the mentioned databases.

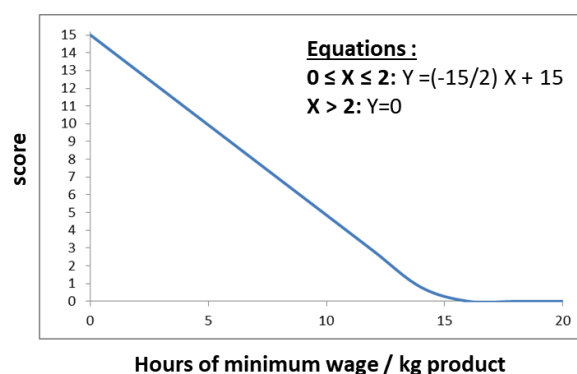**Figure SOC.I2** Conversion scale for sub-indicator “Number of hours of minimum wage required to buy the product”.**Table SOC.I2b** Conversion scale for sub-indicator “Presence of the product on all market segments”.

| Answer | Points |
|--------|--------|
| 0      | 0      |
| 1      | 2      |
| 2      | 4      |
| 3      | 6      |



**SOC.I3—Existence of a Logo Stating the French Origin**

(7 points; 1 indicator)

**Table SOC.I3a** Description of SOC.I3 indicator.

| Indicator                                                                           | Unit             | Scale or<br>SC Links Concerned              | Method(s)           | Origin of<br>Data |
|-------------------------------------------------------------------------------------|------------------|---------------------------------------------|---------------------|-------------------|
| Presence of a logo "French poultry" or<br>an official sign of quality (7<br>points) | ordinal<br>scale | slaughtering, food processing,<br>retailing | survey <sup>1</sup> | operators         |

<sup>1</sup> An average score per SC link is calculated, from which a global average score for SOC.I3 indicator is calculated.

**Table SOC.I3b** Conversion scale for SOC.I3 indicator.

| Answer                                                     | Points |
|------------------------------------------------------------|--------|
| Official sign of quality (Label Rouge, organic farming...) | 7      |
| French poultry                                             | 4      |
| No logo                                                    | 0      |

**SOC.I4—Statement on Absence of GMO in Chicken Feed**

(7 points; 1 indicator)

**Table SOC.I4a** Description of SOC.I4 indicator.

| Indicator                                             | Unit             | Scale or<br>SC Links Concerned              | Method<br>(s)       | Origin of<br>Data |
|-------------------------------------------------------|------------------|---------------------------------------------|---------------------|-------------------|
| Explicit mention on non-GMO animal feed<br>(7 points) | ordinal<br>scale | slaughtering, food processing,<br>retailing | survey <sup>1</sup> | operators         |

<sup>1</sup> An average score per SC link is calculated, from which a global average score for SOC.I3 indicator is calculated.

**Table SOC.I4b** Conversion scale for SOC.I4 indicator.

| Answer                                           | Points |
|--------------------------------------------------|--------|
| Yes                                              | 7      |
| No but non-GMO feed is required in chicken farms | 4      |
| No                                               | 0      |

**SOC.I5–Statement on European Origin of Feedstuffs used in Chicken’s Feed**

(7 points; 1 indicator)

**Table SOC.I5a** Description of SOC.I5 indicator.

| Indicator                                                                            | Unit             | Scale or<br>SC links concerned                | Metho<br>d(s)          | Origin<br>of data |
|--------------------------------------------------------------------------------------|------------------|-----------------------------------------------|------------------------|-------------------|
| Explicit mention on the European origin of feedstuffs used in animal feed (4 points) | ordinal<br>scale | slaughtering, food pro-<br>cessing, retailing | survey<br><sup>1</sup> | opera-<br>tors    |

<sup>1</sup> An average score per SC link is calculated, from which a global average score for SOC.I3 indicator is calculated.

**Table SOC.I5b** Conversion scale for SOC.I5 indicator.

| Explicit Mention on the European Origin of Feedstuffs used in Animal Feed |        |
|---------------------------------------------------------------------------|--------|
| Answer                                                                    | Points |
| Cereals and proteins                                                      | 4      |
| Cereals only                                                              | 2      |
| No                                                                        | 0      |

**SOC.I6–Chicken Welfare**

(21 points; 10 indicator)

**Table SOC.I6** Description of the sub-indicators<sup>1</sup> considered for the calculation of SOC.I6 indicator.

| Sub-indicator                                             | Unit                  | Scale or SC Links Concerned              | Method(s) | Origin of Data |
|-----------------------------------------------------------|-----------------------|------------------------------------------|-----------|----------------|
| Outdoor access for the chickens (1 point)                 | yes / no <sup>2</sup> | chickens farms, production organizations | survey    | operators      |
| Natural light in the chicken house (1 point)              | yes / no <sup>2</sup> | chickens farms, production organizations | survey    | operators      |
| Animal density (3 points)                                 | kg/m <sup>2</sup>     | chickens farms, production organizations | survey    | operators      |
| Transport duration from hatchery to farm (2 points)       | h                     | chickens farms, production organizations | survey    | operators      |
| Transport duration from farm to slaughterhouse (2 points) | h                     | chickens farms, production organizations | survey    | operators      |
| Mortality rate in farms (5 points)                        | %                     | chickens farms, production organizations | survey    | operators      |
| Footpad lesions (2 points)                                | score over 200        | slaughtering                             | survey    | operators      |
| Infected skin lesions (2 points)                          | yes / no <sup>3</sup> | slaughtering                             | survey    | operators      |
| Breast blisters (2 points)                                | yes / no <sup>3</sup> | slaughtering                             | survey    | operators      |
| Corneal reflex (4 points)                                 | %                     | slaughtering                             | survey    | operators      |

<sup>1</sup> An average score per SC link is calculated, from which a global average score is calculated. As the sum of all sub-indicators could exceed 21 (max = 24), this global average score is then multiplied by 21/24 to calculate the final score of SOC.I3 indicator.

<sup>2</sup> 0 point when the answer is no.

<sup>3</sup> 0 point when the answer is yes.

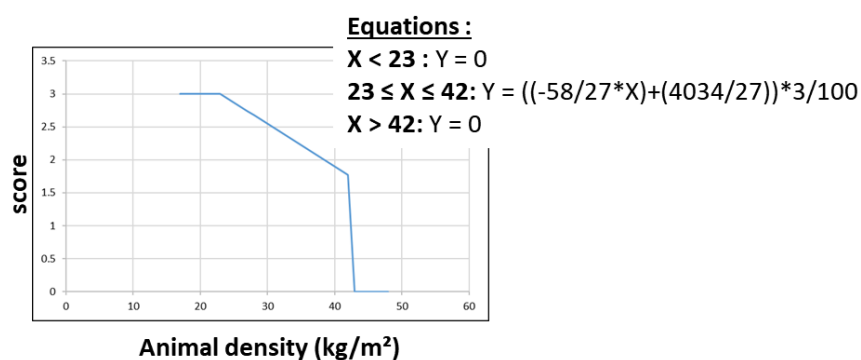**Figure SOC.I6a** Conversion scale for sub-indicator “Animal density”.

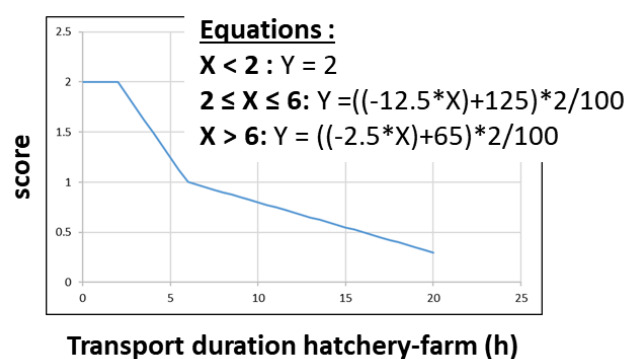

Figure SOC.I6b Conversion scale for sub-indicator “Transport duration from hatchery to farm”.

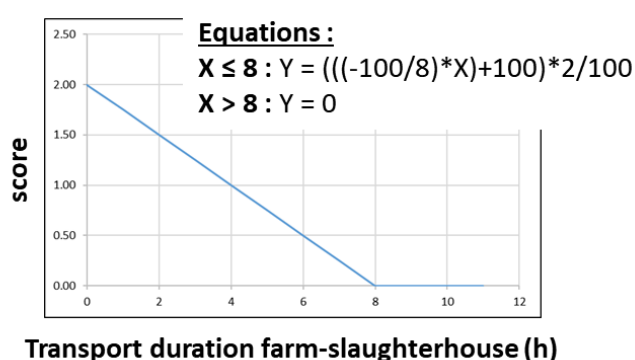

Figure SOC.I6c Conversion scale for sub-indicator “Transport duration from farm to slaughterhouse”.

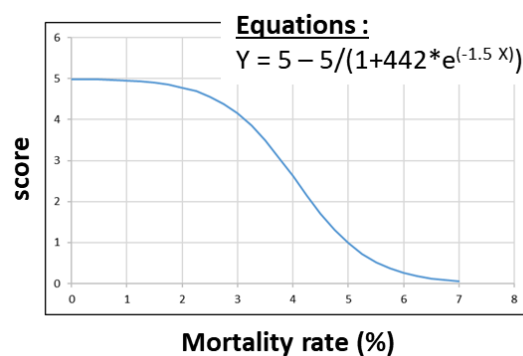

Figure SOC.I6d Conversion scale for sub-indicator “Mortality rate in farms”.

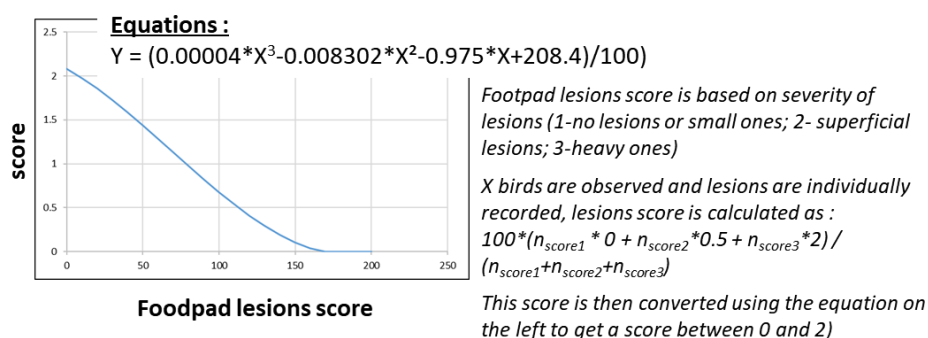

Figure SOC.I6e Conversion scale for sub-indicator “Footpad lesions”.

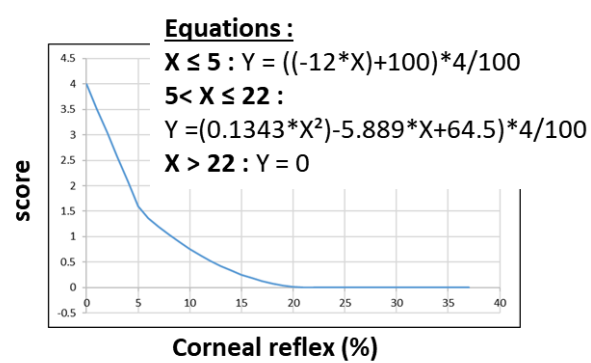

**Figure SOC.I6f** Conversion scale for sub-indicator “Corneal reflex”.

**SOC.I7–Workers' Welfare for Each Link in the Supply Chain**

(18 points; 7 sub-indicators)

**Table SOC.I7a** Description of the sub-indicators<sup>1</sup> considered for the calculation of SOC.I7 indicator.

| Sub-indicator                                                     | Unit          | Scale or SC Links Concerned | Method (s) | Origin of Data |
|-------------------------------------------------------------------|---------------|-----------------------------|------------|----------------|
| Occupational illness (5 points) <sup>2</sup>                      | %             | whole SC                    | survey     | operators      |
| Perception of the income comparatively to working time (3 points) | ordinal scale | chicken farms               | survey     | operators      |
| Perception of the work (3 points)                                 | ordinal scale | chicken farms               | survey     | operators      |
| Perception about the availability of free time (3 points)         | ordinal scale | chicken farms               | survey     | operators      |
| Perception of stress and penibility of work (3 points)            | ordinal scale | chicken farms               | survey     | operators      |
| Perception of professional isolation (2 points)                   | ordinal scale | chicken farms               | survey     | operators      |
| Confidence in the future (3 points)                               | ordinal scale | chicken farms               | survey     | operators      |

<sup>1</sup> An average score per sub-indicator is calculated. Final score for SOC.I7 indicator is the sum of all average sub-indicators scores.

<sup>2</sup> An average score per SC link is calculated. Final score for this sub-indicator is the average of average score per SC link.

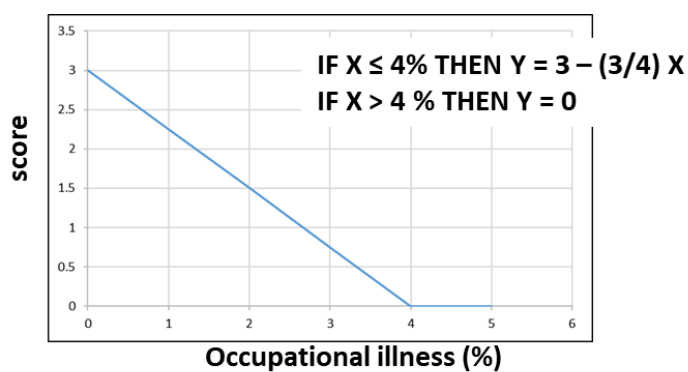

**Figure SOC.I7** Conversion scale for sub-indicator “Occupational illness”. If a corporate social responsibility (CSR) plan is set up, two additional points are given.

**Table SOC.I7b** Conversion scales for sub-indicators considered for the calculation of SOC.I7 indicator. If the sum of the six sub-indicators is above 13, the final score retained is 13.

| Perception of the Income Comparatively to Working Time |        | Perception of the Work               |        | Perception about the Availability of Free Time |        |
|--------------------------------------------------------|--------|--------------------------------------|--------|------------------------------------------------|--------|
| Answer                                                 | Points | Answer                               | Points | Answer                                         | Points |
| Satisfied                                              | 3      | Fulfilling                           | 3      | Satisfied                                      | 3      |
| Quite satisfied                                        | 2      | Interesting                          | 2      | Quite satisfied                                | 2      |
| Quite unsatisfied                                      | 1      | Bearable                             | 1      | Quite unsatisfied                              | 1      |
| Unsatisfied                                            | 0      | Unbearable                           | 0      | Unsatisfied                                    | 0      |
| Perception of Stress and Penibility of work            |        | Perception of Professional Isolation |        | Confidence in the Future                       |        |
| Answer                                                 | Points | Answer                               | Points | Answer                                         | Points |
| Not laborious & not stressful                          | 3      | Not isolated                         | 2      | Very confident                                 | 3      |
| Moderately laborious but not stressful                 | 2.5    | Quite isolated                       | 1      | Quite confident                                | 2      |
| Not laborious but stressful                            | 2      | Very isolated                        | 0      | Little confident                               | 1      |
| Moderately laborious but not stressful                 | 1.5    |                                      |        | Not confident                                  | 0      |
| Laborious but not stressful                            | 1      |                                      |        |                                                |        |
| Laborious & stressful                                  | 0      |                                      |        |                                                |        |



**SOC.I8–Renewal of Poultry Farms**

(6 points; 1 indicator)

**Table SOC.I8** Description of SOC.I8 indicator.

| Sub-indicator                                            | Unit | Scale or<br>SC Links Concerned | Method(s) | Origin of Data |
|----------------------------------------------------------|------|--------------------------------|-----------|----------------|
| Renewal rate of poultry farms <sup>1</sup><br>(6 points) | %    | chicken farms                  | database  | ITAVI          |

<sup>1</sup> Difference between chicken houses construction and loss rates.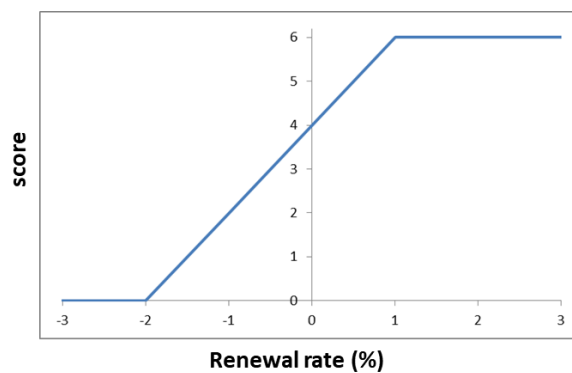**Equations:**

$$X < -2\%: Y = 0$$

$$-2\% \leq X \leq 1\%: Y = 2X + 4$$

$$X > 1\%: Y = 6$$

**Figure SOC.I8** Conversion scale for SOC.I8 indicator.

**SOC.I9–Communication with Public about Poultry Sector**

(24 points; 10 sub-indicators)

**Table SOC.I9** Description of the sub-indicators<sup>1</sup> considered for the calculation of SOC.I9 indicator.

| Sub-indicator                         | Unit                     | Scale or<br>SC Links Concerned                                    | Metho<br>d(s) | Origin of<br>Data |
|---------------------------------------|--------------------------|-------------------------------------------------------------------|---------------|-------------------|
| Documentary / TV report<br>(3 points) | yes /<br>no <sup>2</sup> | whole SC                                                          | survey        | operators         |
| TV advertising (2 points)             | yes /<br>no <sup>2</sup> | slaughtering, food processing, retailing                          | survey        | operators         |
| Radio advertising (2<br>points)       | yes /<br>no <sup>2</sup> | slaughtering, food processing, retailing                          | survey        | operators         |
| Urban advertising (2<br>points)       | yes /<br>no <sup>2</sup> | whole SC (except chicken farms and produc-<br>tion organizations) | survey        | operators         |
| Press advertising (2<br>points)       | yes /<br>no <sup>2</sup> | whole SC (except chicken farms and produc-<br>tion organizations) | survey        | operators         |
| Public exhibitions (3<br>points)      | yes /<br>no <sup>2</sup> | whole SC (except chicken farms and produc-<br>tion organizations) | survey        | operators         |
| Communication training<br>(2 points)  | yes /<br>no <sup>2</sup> | whole SC                                                          | survey        | operators         |
| In-stores events (3 points)           | yes /<br>no <sup>2</sup> | retailing                                                         | survey        | operators         |
| Farm visits (3 points)                | yes /<br>no <sup>2</sup> | chicken farms and production organizations                        | survey        | operators         |
| Other (2 points)                      | yes /<br>no <sup>2</sup> | whole SC                                                          | survey        | operators         |

<sup>1</sup> An average score per sub-indicator is calculated. Final score for SOC.I9 indicator is calculated as the sum of each average score per sub-indicator.

<sup>2</sup> 0 point when the answer is no.

**SOC.I10—Existence of a Crisis Management and Media Monitoring Cell**

(14 points; 3 sub-indicators)

**Table SOC.I10** Description of the sub-indicators<sup>1</sup> considered for the calculation of SOC.I10 indicator.

| Scheme                            | Unit                     | Scale or SC Links Concerned              | Method(s) | Origin of Data |
|-----------------------------------|--------------------------|------------------------------------------|-----------|----------------|
| Crisis prevention plan (4 points) | yes /<br>no <sup>2</sup> | slaughtering, food processing, retailing | survey    | operators      |
| Crisis management plan (5 points) | yes /<br>no <sup>2</sup> | slaughtering, food processing, retailing | survey    | operators      |
| Media monitoring cell (5 points)  | yes /<br>no <sup>2</sup> | slaughtering, food processing, retailing | survey    | operators      |

<sup>1</sup> For each surveyed operator, the sum of the scores of the three sub-indicators is calculated. An average score per SC link is calculated, from which a global average score for SOC.I10 indicator is calculated.

<sup>2</sup> 0 point when the answer is no.

**SOC.I11–Professional Responsibility of Poultry Sector Stakeholders**

(5 points; 1 indicator)

**Table SOC.I11a** Description of SOC.I11 indicator.

| Sub-indicator                                                                        | Unit                                    | Scale or SC links concerned | Method(s)           | Origin of data |
|--------------------------------------------------------------------------------------|-----------------------------------------|-----------------------------|---------------------|----------------|
| Participation to professional organizations, syndicates, directorial board(5 points) | number of professional responsibilities | whole SC (except retailing) | survey <sup>1</sup> | operators      |

<sup>1</sup> An average for companies in all SC links is calculated (*i.e.* without chicken farms). The final score for SOC.I11 indicator is calculated as the average between the average score for chicken farms and companies, in order to give more weight to chickens farms.

**Table SOC.I11b** Conversion scale for SOC.I11 indicator.

| Number of Professional Responsibilities |        |
|-----------------------------------------|--------|
| Answer                                  | Points |
| ≥2                                      | 5      |
| 1                                       | 2.5    |
| 0                                       | 0      |

**SOC.I12–Local and Regional Supply for Mass Catering**

(5 points; 1 indicator)

**Table SOC.I12** Description of SOC.I12 indicator.

| Sub-indicator                                                            | Unit                                               | Scale or SC Links Concerned | Method(s)           | Origin of Data |
|--------------------------------------------------------------------------|----------------------------------------------------|-----------------------------|---------------------|----------------|
| Supplying local mass catering operators with poultry products (5 points) | % of volumes sold to local (<100 km) mass catering | slaughter-                  | survey <sup>1</sup> | operators      |

<sup>1</sup> The final score for the SOC.I12 is calculated as the average between answers of the different surveyed operators.

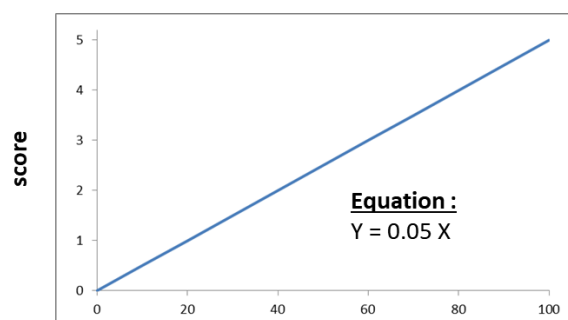**Local supply for mass catering operators (% of total supply)****Figure SOC.I12** Conversion scale for SOC.I12 indicator.

### SOC.I13—Extra-Professional Responsibility of Poultry Industry Stakeholders within the Territory

(4 points; 2 sub-indicators)

**Table SOC.I13** Description of the sub-indicators<sup>1</sup> considered for the calculation of SOC.I13 indicator.

| Sub-indicator                                                                  | Unit                  | Scale or SC Links Concerned                                          | Method(s)                     | Origin of Data |
|--------------------------------------------------------------------------------|-----------------------|----------------------------------------------------------------------|-------------------------------|----------------|
| Sponsoring of local events (sport, music...) (2 points)                        | yes / no <sup>2</sup> | whole SC (except chicken farms, production organizations, retailing) | survey operators <sup>3</sup> | farmers        |
| Participation to local life (political life, local associations...) (2 points) | yes / no <sup>2</sup> | chicken farms, production organizations                              | survey operators <sup>3</sup> | farmers        |

<sup>1</sup> The final score of the SOC.I13 indicator is calculated as the sum score of both sub-indicators.

<sup>2</sup> 0 point when the answer is no.

<sup>3</sup> An average score per SC link is calculated. A global average score for the sub-indicator is calculated using these average scores.

**SOC.I14—Approval of Installation and Expansion Requests in the Territory**

(20 points; 2 sub-indicators)

**Table SOC.I14a** Description of the sub-indicators<sup>1</sup> considered for the calculation of SOC.I14 indicator.

| Sub-indicator                                                          | Unit          | Scale or SC Links Concerned            | Method(s) | Origin of Data     |
|------------------------------------------------------------------------|---------------|----------------------------------------|-----------|--------------------|
| Difficulties during farm installation/expansion procedures (10 points) | ordinal scale | production organization, chicken farms | survey    | operators, farmers |
| Time to get the approval (10 points)                                   | months        | production organization, chicken farms | survey    | operators, farmers |

<sup>1</sup> For each surveyed operator, the scores of the two sub-indicators are added, before the calculation of an average score per SC link. The final score of the SOC.I14 is calculated as the average of these two average scores.

**Table SOC.I14b** Conversion scales for the sub-indicators<sup>1</sup> considered for the calculation of SOC.I14 indicator.

| Difficulties during Farm Installation/Expansion Procedures |        | Time to Get the Approval |        |
|------------------------------------------------------------|--------|--------------------------|--------|
| Answer                                                     | Points | Answer                   | Points |
| Easy                                                       | 10     | 0–6 months               | 10     |
| Quite easy                                                 | 6      | 6–12 months              | 7      |
| Difficult                                                  | 3      | 12–24 months             | 4      |
| Very difficult                                             | 0      | >24 months               | 0      |

---

## Environmental Pillar



**ENV.I1–Consumption of Non-renewable Energy**

(24 points; 1 indicator)

**Table ENV.I1** Description of ENV.I1 indicator.

| Sub-indicator                                   | Unit                | Scale or SC Links Concerned | Method(s)                 | Origin of Data                            |
|-------------------------------------------------|---------------------|-----------------------------|---------------------------|-------------------------------------------|
| Amount of non-renewable energy used (24 points) | MJ / kg live weight | cradle to farm gate         | Life Cycle Analysis (LCA) | operators, LCA databases, emission models |

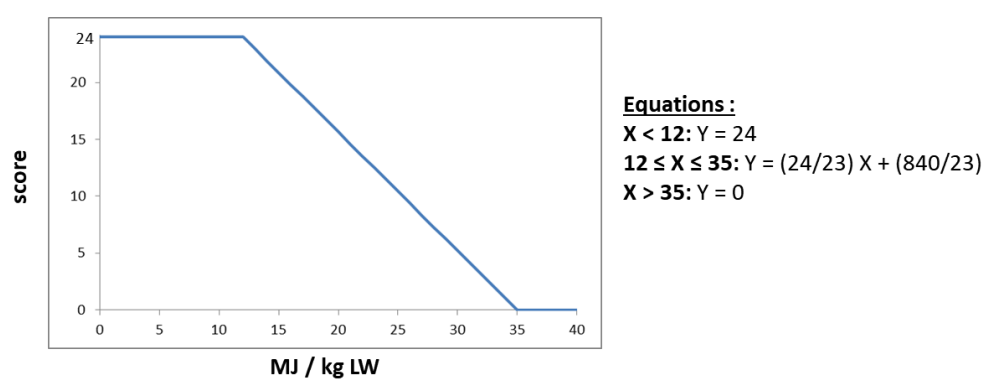**Figure ENV.I1** Conversion scale for ENV.I1 indicator.

## ENV.I2–Consumption of Phosphates by Crops and Animals

(18 points; 1 indicator)

**Table ENV.I2** Description of ENV.I2 indicator.

| Sub-indicator                                                                                                                                             | Unit                 | Scale or<br>SC<br>Links<br>Con-<br>cerned | Method(s)                 | Origin of Data                            |
|-----------------------------------------------------------------------------------------------------------------------------------------------------------|----------------------|-------------------------------------------|---------------------------|-------------------------------------------|
| Amount of mineral phosphate used for the fertilization of crops used in chicken feed, or directly used as a phosphorus source in chicken feed (18 points) | g P / kg live weight | cradle to farm gate                       | Life Cycle Analysis (LCA) | operators, LCA databases, emission models |

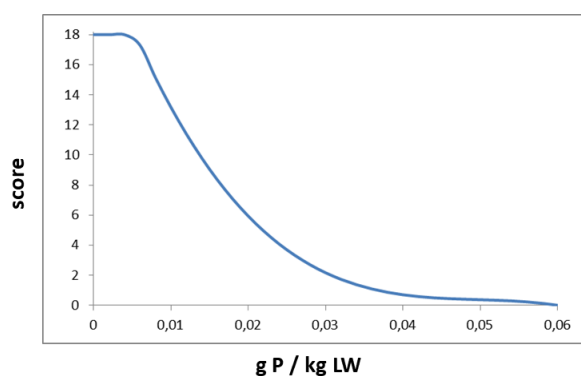

### Equations :

$$X \leq 5: Y = 18$$

$$5 < X < 60: Y = -0.000915 X^3 + 0.02906 X^2 - 1.459 X + 25.05$$

$$X \geq 60: Y = 0$$

**Figure ENV.I2** Conversion scale for ENV.I2 indicator.

**ENV.I3–TotalA of Water Taken from Public Network**

(14 points; 2 sub-indicators)

**Table ENV.I3** Description of the sub-indicators<sup>1</sup> considered for the calculation of ENV.I3 indicator.

| Sub-indicator                                         | Unit                   | Scale or SC Links Concerned | Method(s)                 | Origin of Data                            |
|-------------------------------------------------------|------------------------|-----------------------------|---------------------------|-------------------------------------------|
| Amount of water taken from public network (12 points) | m <sup>3</sup> / kg LW | cradle to farm gate         | Life Cycle Analysis (LCA) | operators, LCA databases, emission models |
| Annual rainfall (2 points) <sup>2</sup>               | mm / year              | region                      | database                  | MeteoFrance                               |

<sup>1</sup> The final score of the ENV.I3 indicator is calculated as the sum of the two sub-indicators' scores.<sup>2</sup> Two additional points are given when the territory in which the studied SC is located is not limiting in water (i.e. annual rainfall  $\geq 800$  mm/year).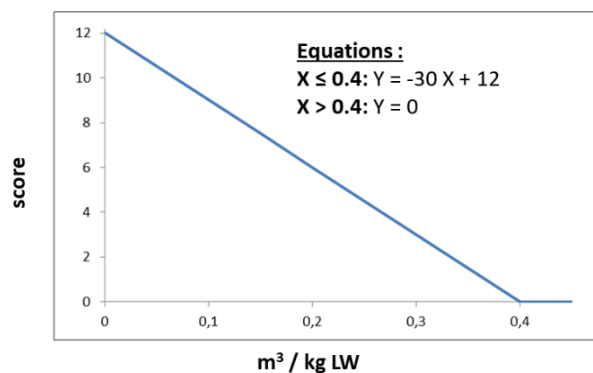**Figure ENV.I3** Conversion scale for sub-indicator “Amount of water taken from public network”.

**ENV.I4—Approval of Installation and Expansion Requests in the Territory**  
(7 points; 1 indicator)

**Table ENV.I4a** Description of ENV.I4 indicator.

| Sub-indicator                                                                        | Unit                     | Scale or SC Links Concerned | Method(s) | Origin of Data |
|--------------------------------------------------------------------------------------|--------------------------|-----------------------------|-----------|----------------|
| Number of pedigree lines currently used for genetic selection of chickens (7 points) | number of pedigree lines | genetic selection           | survey    | operators      |

**Table ENV.I4b** Conversion scale for ENV.I4 indicator.

| Number of Pedigree Lines |        |
|--------------------------|--------|
| Answer                   | Points |
| >40                      | 7      |
| [31–40]                  | 6      |
| [21–30]                  | 4      |
| [11–20]                  | 2      |
| [0–10]                   | 0      |

**ENV.I5–Number of Vegetal Species used in Chickens Feed**

(6 points; 1 indicator)

**Table ENV.I5** Description of ENV.I5 indicator.

| Sub-indicator                                                        | Unit              | Scale or SC Links Concerned | Method(s)        | Origin of Data |
|----------------------------------------------------------------------|-------------------|-----------------------------|------------------|----------------|
| Number of vegetal species composing diets fed to chickens (6 points) | number of species | feed production             | survey operators |                |

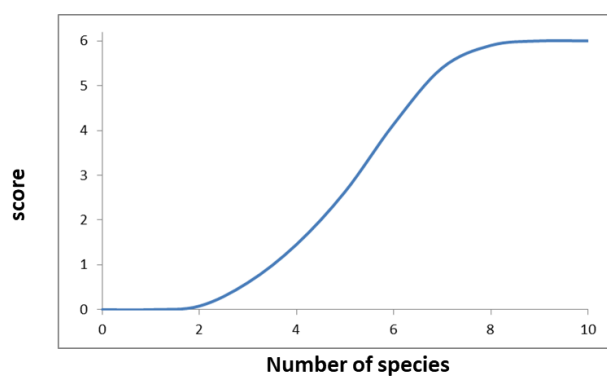**Equations:**

$$0 \leq X \leq 7: Y = 0.1637 X^2 - 0.2945 X + 0.01463$$

$$X > 7: Y = 6$$

**Figure ENV.I5** Conversion scale for ENV.I5 indicator.

**ENV.I6–Total Emission of Greenhouse Gas**

(16 points; 1 indicator)

**Table ENV.I6** Description of ENV.I6 indicator.

| Sub-indicator                        | Unit                                    | Scale or SC Links Concerned | Method(s)                 | Origin of Data                            |
|--------------------------------------|-----------------------------------------|-----------------------------|---------------------------|-------------------------------------------|
| Amount of greenhouse gas (16 points) | kg CO <sub>2</sub> -eq / kg live weight | cradle to farm gate         | Life Cycle Analysis (LCA) | operators, LCA databases, emission models |

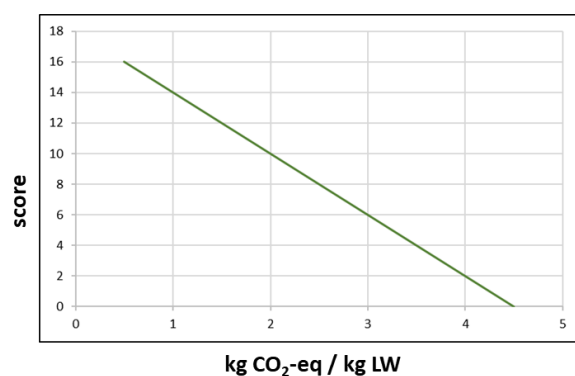**Equations :**

$$0.5 < X: Y = 16$$

$$0.5 \leq X \leq 4.5: Y = -4 X + 18$$

$$X > 4.5: Y = 0$$

**Figure ENV.I6** Conversion scale for ENV.I6 indicator.

**ENV.I7–Total Particle Emission**

(8 points; 1 indicator)

**Table ENV.I7a** Description of ENV.I7 indicator.

| Sub-indicator                                          | Unit                   | Scale or SC Links Concerned | Method(s)  | Origin of Data                                         |
|--------------------------------------------------------|------------------------|-----------------------------|------------|--------------------------------------------------------|
| Amount of Total Suspended Particulate (TSP) (8 points) | kg TSP / animal / year | chicken farms               | literature | EMEP, 2009. Air pollutant emission inventory guidebook |

**Table ENV.I7b** Conversion scale for ENV.I7 indicator.

| kg TSP / Animal / Year |        |
|------------------------|--------|
| Answer                 | Points |
| [0–0.5]                | 8      |
| ]0.5–1]                | 6      |
| ]1–1.5]                | 4      |
| ]1.5–2]                | 2      |
| >2                     | 0      |

**ENV.I8–Eutrophication**

(7 points; 1 indicator)

**Table ENV.I8** Description of ENV.I8 indicator.

| Sub-indicator                       | Unit                                                  | Scale or SC Links Concerned | Method(s)                 | Origin of Data                            |
|-------------------------------------|-------------------------------------------------------|-----------------------------|---------------------------|-------------------------------------------|
| Potential eutrophication (7 points) | kg PO <sub>4</sub> <sup>3-</sup> -eq / kg live weight | cradle to farm gate         | Life Cycle Analysis (LCA) | operators, LCA databases, emission models |

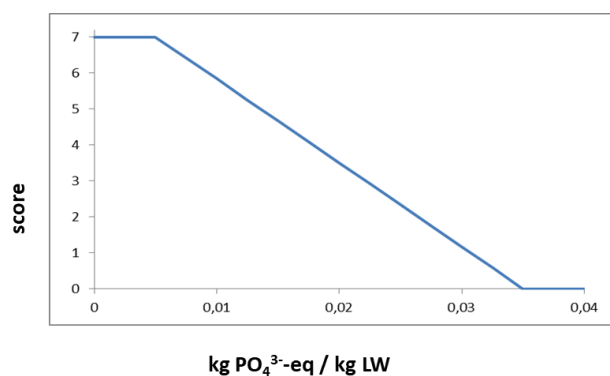**Equations :**

$$0.005 < X: Y = 7$$

$$0.005 \leq X \leq 0.035: Y = (-7/0.03) X + (0.245/0.03)$$

$$X > 0.035: Y = 0$$

**Figure ENV.I8** Conversion scale for ENV.I8 indicator.



**ENV.I9–Acidification**

(7 points; 1 indicator)

**Table ENV.I9** Description of ENV.I9 indicator.

| Sub-indicator                         | Unit                                    | Scale or SC Links Concerned | Method(s)                 | Origin of Data                            |
|---------------------------------------|-----------------------------------------|-----------------------------|---------------------------|-------------------------------------------|
| Potential acidification<br>(7 points) | kg SO <sub>2</sub> -eq / kg live weight | cradle to farm gate         | Life Cycle Analysis (LCA) | operators, LCA databases, emission models |

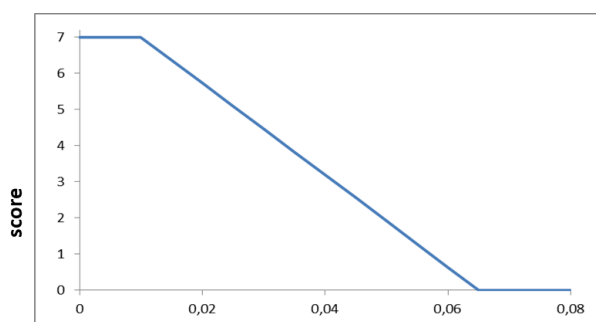**Equations :**

$$0.01 < X: Y = 7$$

$$0.01 \leq X \leq 0.065: Y = (-7/0.055) X + (7*0.065/0.055)$$

$$X > 0.065: Y = 0$$

kg SO<sub>2</sub>-eq / kg LW**Figure ENV.I9** Conversion scale for ENV.I9 indicator.

**ENV.I10–Total Particle Emission**

(6 points; 1 indicator)

**Table ENV.I10a** Description of ENV.I10 indicator.

| Sub-indicator                       | Unit                     | Scale or<br>SC Links<br>Concerned | Method(s)                       | Origin of Data                               |
|-------------------------------------|--------------------------|-----------------------------------|---------------------------------|----------------------------------------------|
| Potential ecotoxicity<br>(6 points) | CTUe / kg live<br>weight | cradle to farm<br>gate            | Life Cycle<br>Analysis<br>(LCA) | operators, LCA databases,<br>emission models |

CTUe: Comparative Toxic Unit.

**Table ENV.I10b** Conversion scale for ENV.I10 indicator.

| CTUe/Kg Live Weight |        |
|---------------------|--------|
| Answer              | Points |
| [0–1]               | 6      |
| ]1–2]               | 3      |
| >2                  | 0      |

**ENV.I11–Use of Allopathic Treatments**

(7 points; 1 indicator)

**Table ENV.I11** Description of ENV.I11 indicator.

| Sub-indicator                                            | Unit                                                 | Scale or SC Links Concerned | Method(s) | Origin of Data |
|----------------------------------------------------------|------------------------------------------------------|-----------------------------|-----------|----------------|
| Amount of antibiotics and anticoccidians used (7 points) | kg live weight treated / 100 kg live weight produced | chicken farms               | survey    | operators      |

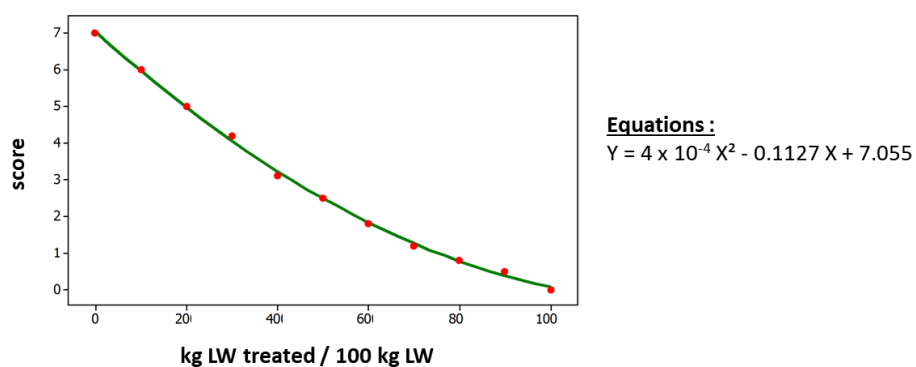**Figure ENV.I11** Conversion scale for ENV.I11 indicator.

**ENV.I12–Proportion of Used By-products**

(17 points; 3 sub-indicators)

**Table ENV.I12a** Description of the sub-indicators<sup>1</sup> considered for the calculation of ENV.I12 indicator.

| Sub-indicator                                                               | Unit | Scale or SC Links Concerned | Method (s) | Origin of Data |
|-----------------------------------------------------------------------------|------|-----------------------------|------------|----------------|
| Share of animal by-products which are re-used by other operators (4 points) | %    | hatchery                    | survey     | operators      |
| Share of animal by-products which are re-used by other operators (6 points) | %    | slaughtering                | survey     | operators      |
| Share of vegetal by-products used in chicken feed (7 points)                | %    | feed production             | survey     | operators      |

<sup>1</sup> For each SC link, an average score is calculated. The final score of ENV.I12 indicator is the sum of the three sub-indicators' scores.

**Table ENV.I12b** Conversion scale for sub-indicator “Share of animal by-products which are re-used by other operators”.

| Share of animal by-products re-used in the SC |        |                 |        |
|-----------------------------------------------|--------|-----------------|--------|
| Hatchery                                      |        | Slaughterhouses |        |
| Answer                                        | Points | Answer          | Points |
| >80%                                          | 4      | >90%            | 6      |
| ]70%–80%]                                     | 3      | ]70%–90%]       | 4      |
| ]60%–70%]                                     | 2      | ]50%–70%]       | 2      |
| ]50%–60%]                                     | 1      | ]0%–50%]        | 0      |
| ]0%–50%]                                      | 0      |                 |        |

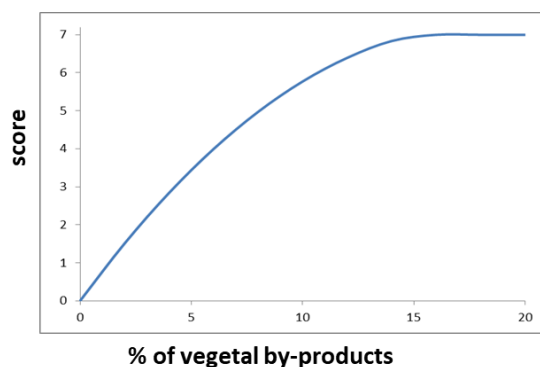**Equations :**

$$X \leq 14 : Y = -0.02219 X^2 + 0.7987 X + 0.003506$$

$$X \geq 14 : Y = 7$$

**Figure ENV.I12** Conversion scale for sub-indicator “Share of vegetal by-products used in chicken feed”.

**ENV.I13–Integration of Production Equipment into Landscape**

(11 points; 13 sub-indicators)

**Table ENV.I13a** Description of the sub-indicators<sup>1</sup> considered for the calculation of ENV.I13 indicator.

| Sub-indicator                                                   | Unit                  | Scale or SC Links Concerned                                                                | Method(s) | Origin of Data |
|-----------------------------------------------------------------|-----------------------|--------------------------------------------------------------------------------------------|-----------|----------------|
| Color of building materials in harmony with landscape (1 point) | ordinal scale         | genetic selection, hatchery, firm services, feed production, slaughtering, food processing | survey    | operators      |
| Cleanliness around buildings (0.5 point)                        | ordinal scale         | genetic selection, hatchery, firm services, feed production, slaughtering, food processing | survey    | operators      |
| Plants around buildings (1 point)                               | yes / no <sup>2</sup> | genetic selection, hatchery, firm services, feed production, slaughtering, food processing | survey    | operators      |
| Trees around buildings (1 point)                                | yes / no <sup>2</sup> | genetic selection, hatchery, firm services, feed production, slaughtering, food processing | survey    | operators      |
| Mowed lawn (1 point)                                            | yes / no <sup>2</sup> | genetic selection, hatchery, firm services, feed production, slaughtering, food processing | survey    | operators      |
| Color of building materials in harmony with landscape (1 point) | ordinal scale         | chicken farms                                                                              | survey    | farmers        |
| Wood on chicken houses (0.5 point)                              | ordinal scale         | chicken farms                                                                              | survey    | farmers        |
| Cleanliness around buildings (0.5 point)                        | ordinal scale         | chicken farms                                                                              | survey    | farmers        |
| Quality of surroundings (0.5 point)                             | ordinal scale         | chicken farms                                                                              | survey    | farmers        |
| Accessibility of surrounding for trucks (0.5 point)             | yes / no <sup>2</sup> | chicken farms                                                                              | survey    | farmers        |
| Plants around buildings (1 point)                               | yes / no <sup>2</sup> | chicken farms                                                                              | survey    | farmers        |
| Trees around buildings (2 points)                               | yes / no <sup>2</sup> | chicken farms                                                                              | survey    | farmers        |
| Grass cover around buildings (0.5 point)                        | yes / no <sup>2</sup> | chicken farms                                                                              | survey    | farmers        |

<sup>1</sup> For each SC link, the scores of sub-indicators are added to calculate an average score per SC link. An overall average including genetic selection, hatchery, firm services, feed production, slaughtering and food processing scores is calculated and added to the average score of chicken farms to provide the final score of ENV.13 indicator.

<sup>2</sup> 0 point when the answer is no.

**Table ENV.I13b** Conversion scale for sub-indicator “Color of building materials in harmony with landscape”.

| Color of Building Materials in Harmony with Landscape |        |                |        |
|-------------------------------------------------------|--------|----------------|--------|
| Chicken farms                                         |        | Other SC links |        |
| Answer                                                | Points | Answer         | Points |

|           |     |     |   |
|-----------|-----|-----|---|
| Yes       | 1   | Yes | 1 |
| Partially | 0.5 | No  | 0 |
| No        | 0   |     |   |

**Table ENV.I13c** Conversion scales for sub-indicators “Cleanliness around buildings”, “Quality of surroundings”, and “Wood on chicken houses”.

| Cleanliness around Buildings |        | Quality of Surroundings    |        | Wood on Chicken Houses     |        |
|------------------------------|--------|----------------------------|--------|----------------------------|--------|
| Answer                       | Points | Answer                     | Points | Answer                     | Points |
| Clean                        | 0.5    | Good quality               | 0.5    | At least one chicken house | 0.5    |
| Messy                        | 0      | Presence of holes, puddles | 0      | No                         | 0      |

**ENV.I14–Integration of Production Equipment into Landscape**

(11 points; 4 sub-indicators)

**Table ENV.I14a** Description of the sub-indicators<sup>1</sup> considered for the calculation of ENV.I14 indicator.

| Sub-indicator                                 | Unit                  | Scale or SC Links Concerned | Method(s) | Origin of Data |
|-----------------------------------------------|-----------------------|-----------------------------|-----------|----------------|
| Share of non-used buildings (5 points)        | %                     | chicken farms               | survey    | farmers        |
| Eco-construction of chicken houses (2 points) | ordinal scale         | chicken farms               | survey    | farmers        |
| Recycling of medical waste (3 points)         | yes / no <sup>2</sup> | chicken farms               | survey    | farmers        |
| Recycling of other waste (1 point)            | yes / no <sup>2</sup> | chicken farms               | survey    | farmers        |

<sup>1</sup> For each surveyed farm, the sum of the four sub-indicators is calculated. An average of these sums is used as the final score of ENV.I14 indicator.

<sup>2</sup> 0 point when the answer is no.

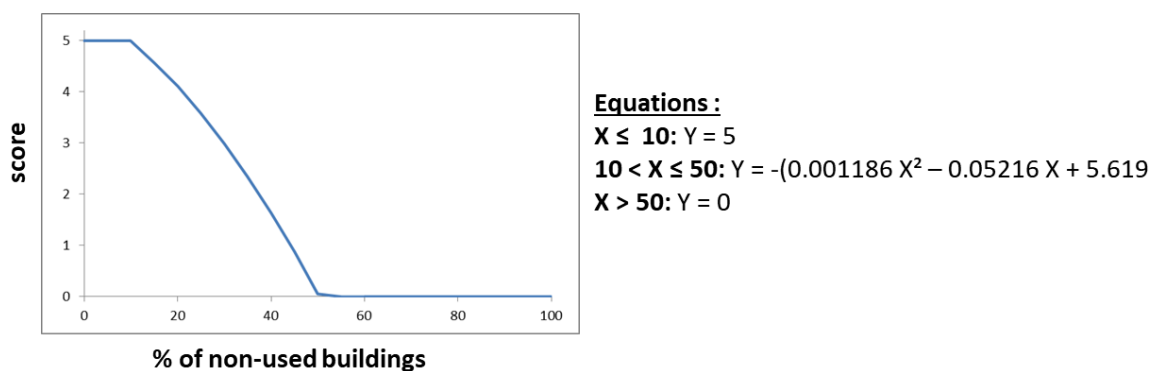**Figure ENV.I14** Conversion scale for sub-indicator “Share of non-used buildings”.**Table ENV.I14b.** Conversion scale for sub-indicator “Eco-construction of chicken houses”.

| Eco-construction of Chicken Houses |        |
|------------------------------------|--------|
| Answer                             | Points |
| At least one chicken house         | 2      |
| No                                 | 0      |

**ENV.I15–Agroecological Landscaping in Farms**

(11 points; 1 indicator)

**Table ENV.I15a** Description of ENV.I15 indicator.

| Sub-indicator                                                                  | Unit                                                        | Scale or SC Links Concerned | Method(s)        | Origin of Data |
|--------------------------------------------------------------------------------|-------------------------------------------------------------|-----------------------------|------------------|----------------|
| Presence of agro-ecological structures (hedges, meadows, trees...) (11 points) | ha of equivalent surface in topographic elements (STE)<br>1 | chicken farms               | survey, database | farmers        |

<sup>1</sup> Surface or length of different agro-ecological structures are considered and converted in the same unit (*i.e.* ha of STE; Table ENV.I15b) before being summed. The total surface is then converted using the conversion scale presented in Figure ENV.I15.

**Table ENV.I15b** Surface in topographic elements (STE) conversion factors.

| Agro-ecological Structure                             | Length or Surface | ha of STE |
|-------------------------------------------------------|-------------------|-----------|
| Hedge with local species                              | 100 linear meters | 1         |
| Forest border or grove                                | 100 linear meters | 1         |
| Alignment of trees                                    | 100 linear meters | 0.1       |
| Isolated tree                                         | 1 tree            | 0.005     |
| Low walls                                             | 100 linear meters | 0.5       |
| Permanent meadows, outdoor run                        | 1 ha              | 1         |
| Natura 2000 surfaces or permanent meadows (>50 years) | 1 ha              | 2         |

Source: <https://agriculture.gouv.fr/telecharger/96535?to-ken=6d4f782a81c880561d3f19077b9a5d90607ff9ace98f8f2af2b46e0a195e5685>.

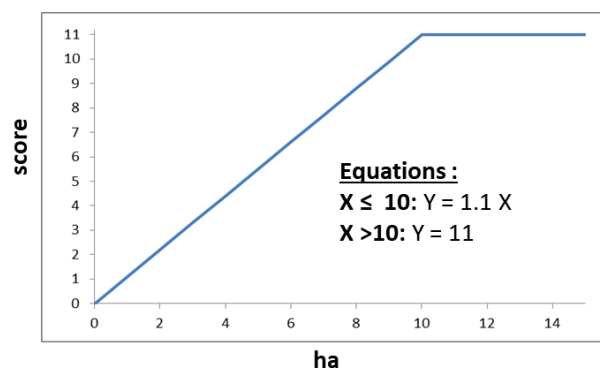**Figure ENV.I15** Conversion scale for ENV.I15 indicator.**ENV.I16–Integration of Production Equipment into Landscape**

(10 points; 2 sub-indicators)

**Table ENV.I16a** Description of the sub-indicators<sup>1</sup> considered for the calculation of ENV.I16 indicator.

| Sub-indicator                                          | Unit          | Scale or SC Links Concerned | Method(s) | Origin of Data |
|--------------------------------------------------------|---------------|-----------------------------|-----------|----------------|
| Use of responsible soybean in chicken feed (8 points)  | ordinal scale | feed production             | survey    | operators      |
| Use of responsible palm oil in chicken feed (2 points) | ordinal scale | feed production             | survey    | operators      |

<sup>1</sup> The final score of the ENV.I16 indicator is the sum of the two sub-indicators' scores.



**Table ENV.I16c** Conversion scales for sub-indicators “Cleanliness around buildings”, “Quality of surroundings”, and “Wood on chicken houses”.

| Use of Responsible Soybean               |        | Use of Responsible Palm Oil |        |
|------------------------------------------|--------|-----------------------------|--------|
| Answer                                   | Points | Answer                      | Points |
| No use of soybean                        | 8      | No use of palm oil          | 2      |
| European soybean                         | 8      | RSPO palm oil <sup>4</sup>  | 2      |
| RTRS soybean (segregation) <sup>1</sup>  | 8      | Non labelled palm oil       | 0      |
| ProTerra soybean <sup>2</sup>            | 7      |                             |        |
| RTRS soybean (mass balance) <sup>1</sup> | 6      |                             |        |
| Non labelled and non-European soybean    | 0      |                             |        |

<sup>1</sup> Round Table Responsible Soy:

<http://www.responsiblesoy.org/certification/tipos-de-certificacion/cadena-de-custodia/?lang=en>.

<sup>2</sup> [http://proterrafoundation.org/files/ProTerra\\_Standard\\_V3.0\\_EN.pdf](http://proterrafoundation.org/files/ProTerra_Standard_V3.0_EN.pdf).

<sup>3</sup> Roundtable on Sustainable Palm Oil: <http://www.rspo.org/>.
